# Supplementary material for: Chaperone co‐inducer BGP‐15 mitigates early contractile dysfunction of the soleus muscle in a rat ICU model
Source: PubMed Central journal article supplement (PMC7187345; doi:10.1111/apha.13425), 2019-12-18
Supplement: APHA-229-e13425-s001.pdf [file APHA-229-e13425-s001.pdf]

## Supplementary material

### S1. Real-Time PCR Primer List

| <b>Transcripts</b>              | <b>Primer FWD 5' - 3'</b>  | <b>Primer REV 5' - 3'</b>  |
|---------------------------------|----------------------------|----------------------------|
| <b>GAPDH</b>                    | AACCCATCACCCATCTTCCAG      | GTGGTTCACACCCATCACAA       |
| <b>PGC 1<math>\alpha</math></b> | TGATGTGAATGACCTGGACACAGACA | GCTCATTGTTGTACTGGTTGGATATG |
| <b>MFN1</b>                     | CTGCGATCTTCGGCCAGTTA       | AGCCCTGTATCTCCACCAGAT      |
| <b>MFN2</b>                     | GACTCCAGCCATGTCCATGAT      | GGCAGTGACAAAGTGCTTGAG      |
| <b>OPA1</b>                     | TCTTCACTGCGGGTACACCT       | TTCTCCTTCTCCAAACGCTCC      |
| <b>DRP1</b>                     | ATGGTGGTCAGGAACCGACA       | GCAAATTGACAGCATGGCCT       |
| <b>MyHCI</b>                    | CTCGCTCCCTCAGCACAGA        | CTGCTCAGTCAAGTCGGAGATCT    |
| <b>MyHCIIa</b>                  | AAACCCTGAAGCGAGAGAACAA     | TCATGGATACGTTTCCCTCCTT     |
| <b>MyHCIIx</b>                  | CAAAGGTGAAATCCTACAAGAGACAA | TGGATCCTCCGGAATTTGG        |
| <i>Atrogin-1</i>                | GTCCAGAGAGTCGGCAAGTC       | GTAGCCGGTCTTCACTGAGC       |
| <b>MuRF1</b>                    | GAGAACCTGGAGAAGCAGCT       | CCGCGGTTGGTCCAGTAG         |
| <b>SMART</b>                    | ACCATGGCGTCGGTAGCGGGGACA   | CTCGGCTGTGTCCTCCTTTGCACTG  |
| <b>Fbxo31</b>                   | CCATACGGAGGACTGCTGA        | GTACATCCACCCGATGATGA       |
| <b>Actin</b>                    | AGGTCATCACCCATCGGCAAT      | AAGGAAGGCTGGAAGAGCGT       |
